# Supplementary material for: A facile one-step way to anchor noble metal (Au, Ag, Pd) nanoparticles on a reduced graphene oxide mat with catalytic activity for selective reduction of nitroaromatic compounds
Source: Royal Society of Chemistry journal article supplement (doi:10.1039/c3ce40694f), 2013-01-01
Supplement: c3ce40694f.pdf [file c3ce40694f.pdf]

## Supporting Information

A facile one-step way to anchor noble metal (Au, Ag, Pd) nanoparticles on the reduced graphene oxide mat with catalytic activity for selective reduction of nitroaromatic compounds

*Min-Quan Yang, Xiaoyang Pan, Nan Zhang and Yi-Jun Xu \**

*State Key Laboratory Breeding Base of Photocatalysis, College of Chemistry and Chemical Engineering, Fuzhou University, Fuzhou, 350002, P. R. China*

\* Corresponding Author. Tel.: +86 591 83779326; E-mail: [yjxu@fzu.edu.cn](mailto:yjxu@fzu.edu.cn)

**Preparation of PVP-protected noble metal Au and Pd colloids.**

Typically, 10 mL of 2.0 mM noble metal precursors solution ( $\text{HAuCl}_4$ ,  $\text{H}_2\text{PdCl}_4$ ), 30 mL of  $\text{H}_2\text{O}$  and 0.0889 g of PVP (average molecular weight of PVP 40 000) was mixed homogeneously. Then, 2.4 mL of 0.1 M  $\text{NaBH}_4$  aqueous solution was added to the above solution quickly. After that, the mixture was stirred for 5 h and the resulting solution of Au and Pd colloids protected by PVP was obtained.

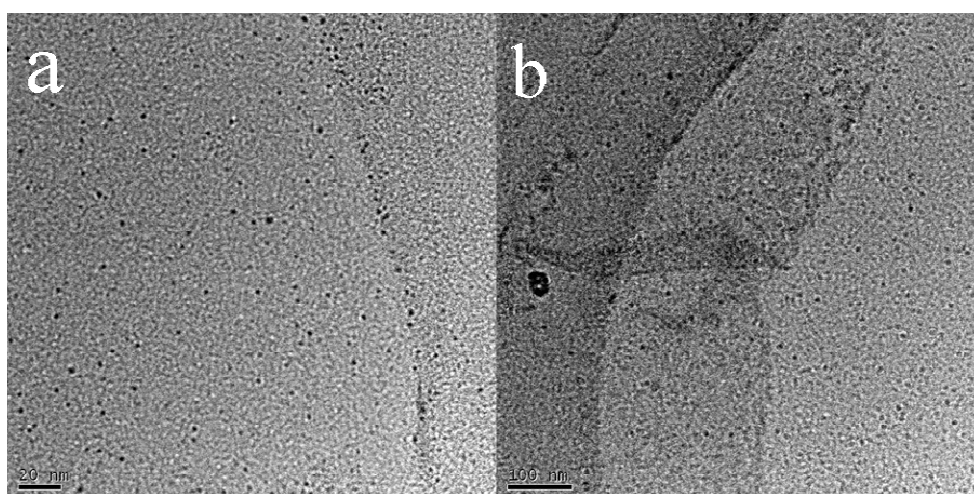

**Fig. S1** TEM images of the as-synthesized Au-PRGO nanocomposites.

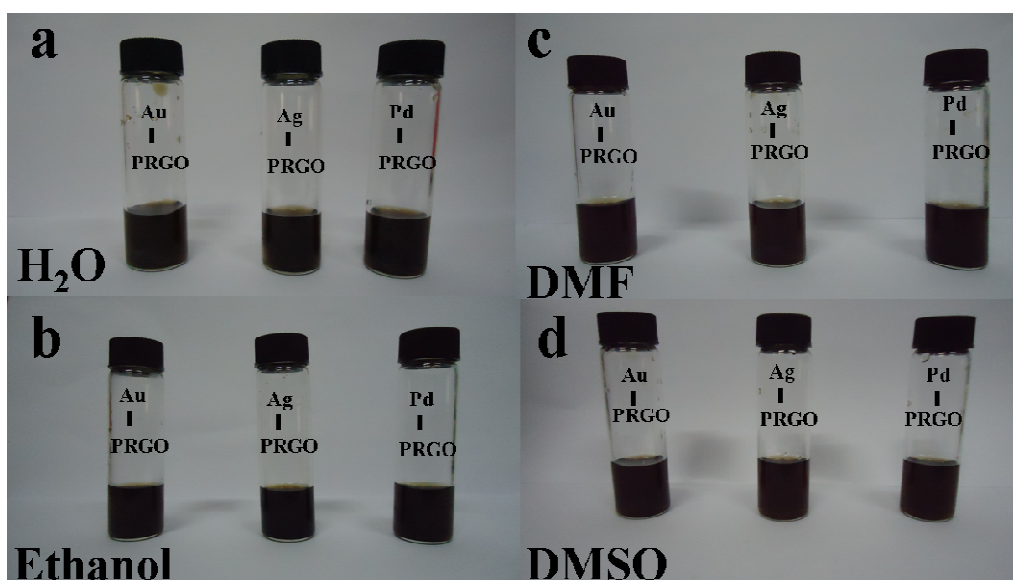

**Fig. S2** Photographs of the as-synthesized Au, Ag, Pd-PRGO nanocomposites redispersed in deionized water, ethanol, N,N-dimethylformamide (DMF) and dimethyl sulfoxide (DMSO).

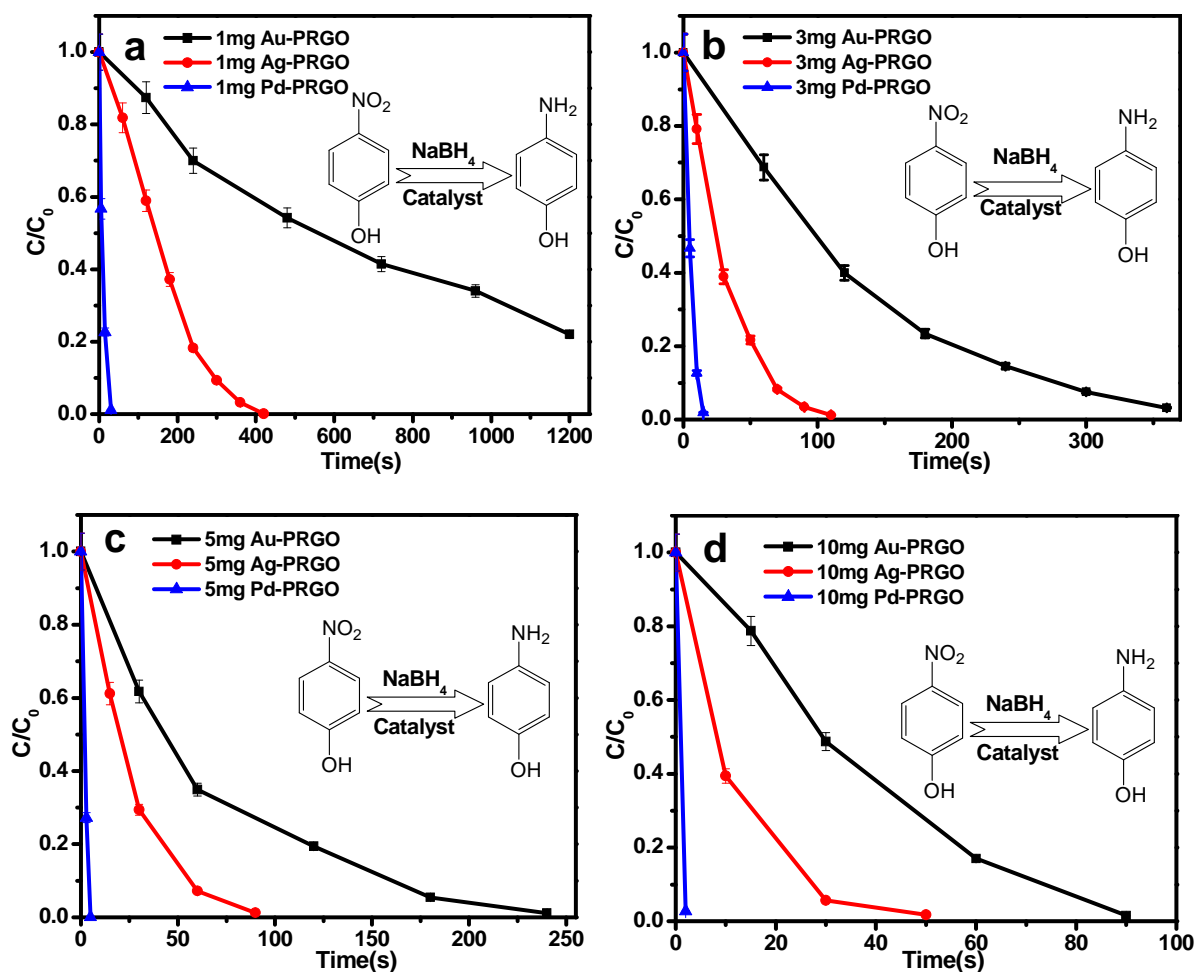

**Fig. S3** Catalytic activity for reduction of 4-nitrophenol (4-NP) to 4-aminophenol (4-AP) over Au, Ag, Pd-PRGO nanocomposites with different catalyst loadings at room temperature.

**Table S1:** Catalytic activities comparison of Au, Ag, Pd-PRGO for the reduction of 4-nitrophenol (4-NP) with other supported Au, Ag and Pd catalysts in literatures.

| Samples                                              | Catalyst (mg) | 4-NP (mmol)           | Metal | Main size distribution | $k/s^{-1}$            | Reference |
|------------------------------------------------------|---------------|-----------------------|-------|------------------------|-----------------------|-----------|
| Au-PRGO                                              | 3             | $3.0 \times 10^{-3}$  | Au    | 1-30 nm                | $8.77 \times 10^{-3}$ | This work |
| Ag-PRGO                                              | 3             | $3.0 \times 10^{-3}$  | Ag    | 3-10 nm                | $3.74 \times 10^{-2}$ | This work |
| Pd-PRGO                                              | 3             | $3.0 \times 10^{-3}$  | Pd    | 0.5-3 nm               | $2.4 \times 10^{-1}$  | This work |
| Au/PMMA                                              | 3.5           | $1.35 \times 10^{-3}$ | Au    | 2-11 nm                | $7.9 \times 10^{-3}$  | Ref.S1    |
| Spongy Au                                            | 6             | $3.0 \times 10^{-4}$  | Au    | 20-140 nm              | $2.1 \times 10^{-3}$  | Ref.S2    |
| Ag/HLaNb <sub>2</sub> O <sub>7</sub>                 | 3             | $5.0 \times 10^{-3}$  | Ag    | 10-40 nm               | $3.01 \times 10^{-3}$ | Ref.S3    |
| Ag/Resin                                             | 1.5           | $3.0 \times 10^{-4}$  | Ag    | 25-35 nm               | $5.27 \times 10^{-3}$ | Ref.S4    |
| Fe <sub>3</sub> O <sub>4</sub> @C/Pd                 | 0.1           | $1.4 \times 10^{-4}$  | Pd    | 6-15 nm                | $3.25 \times 10^{-3}$ | Ref.S5    |
| Fe <sub>x</sub> O <sub>y</sub> /Pd@mSiO <sub>2</sub> | 0.1           | $1.4 \times 10^{-4}$  | Pd    | 12-21 nm               | $1.6 \times 10^{-3}$  | Ref.S5    |

Note: PMMA is the support of poly (methyl methacrylate), mSiO<sub>2</sub> is mesoporous SiO<sub>2</sub>.

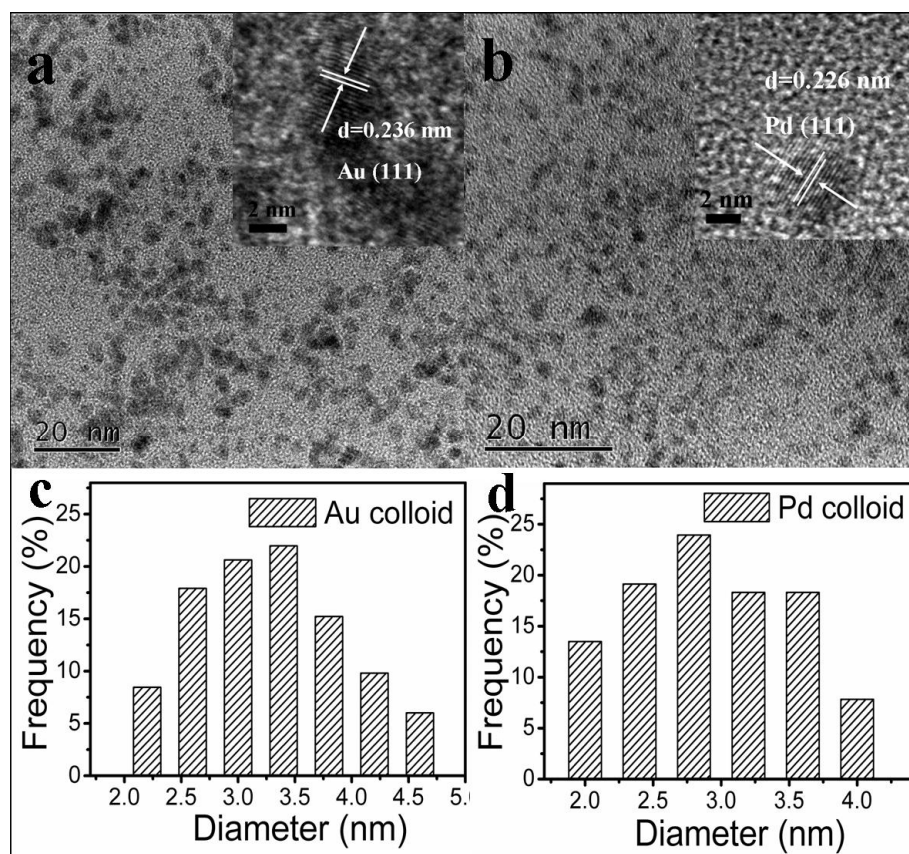

**Fig. S4** Typical TEM images and the statistic histograms of noble metal particles size distribution, Au colloid (a, c) and Pd colloid (b, d); the insets in (a) and (b) are the HR-TEM images of Au and Pd colloid nanoparticles.

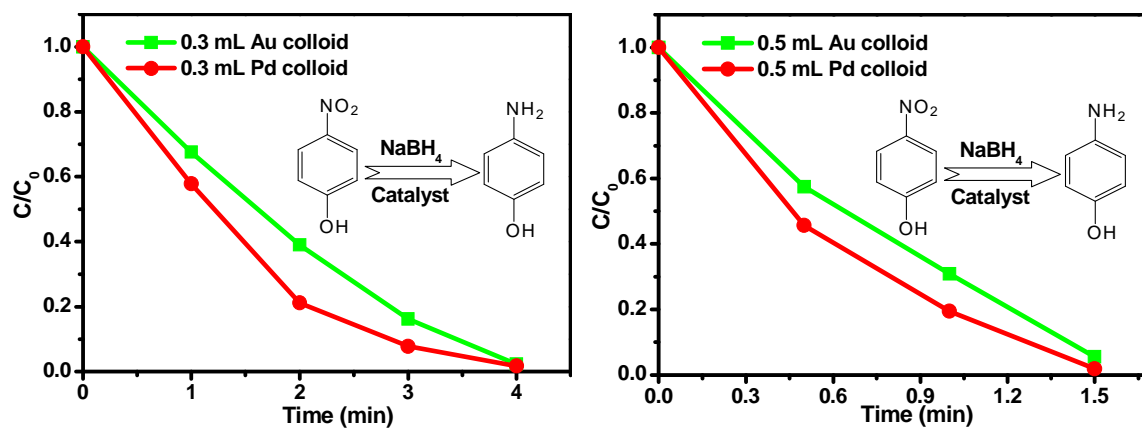

**Fig. S5** Catalytic activity for reduction of 30 mL of 10 ppm 4-nitrophenol (4-NP) to 4-aminophenol (4-AP) over Au and Pd colloids with the addition of  $\text{NaBH}_4$  (15 mg) at room temperature.

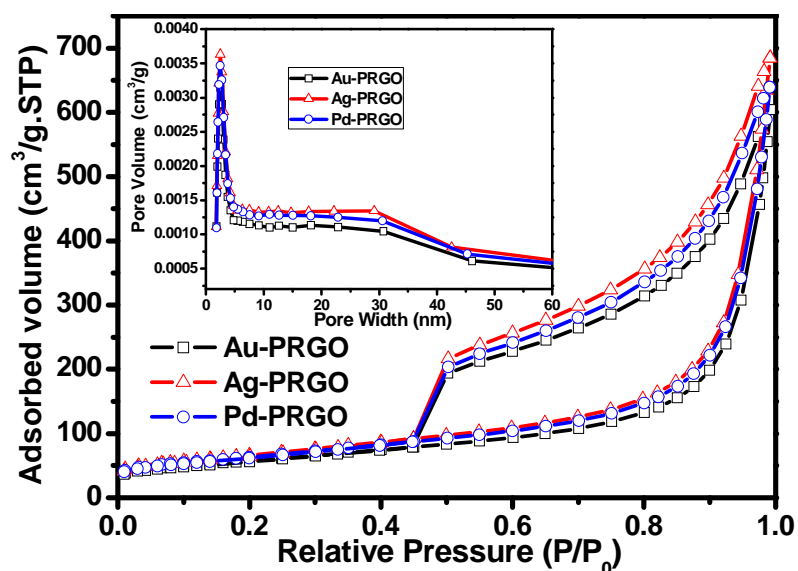

| Samples | BET surface area<br>(m <sup>2</sup> g <sup>-1</sup> ) | Pore volume<br>(cm <sup>3</sup> g <sup>-1</sup> ) |
|---------|-------------------------------------------------------|---------------------------------------------------|
| Au-PRGO | 204                                                   | 0.9377                                            |
| Ag-PRGO | 236                                                   | 1.0632                                            |
| Pd-PRGO | 225                                                   | 0.9926                                            |

**Fig. S6** The N<sub>2</sub> adsorption–desorption isotherms, and summary of BET surface area and pore volume of the Au-PRGO, Ag-PRGO and Pd-PRGO nanocomposites; inset figure is the corresponding pore size distribution.

## References

- S1. Kuroda, K.; Ishida, T.; Haruta, M. *J. Mol. Catal., A*, 2009, **298**, 7-11.  
 S2. M. H. Rashid, R. R. Bhattacharjee, A. Kotal and T. K. Mandal, *Langmuir*, 2006, **22**, 7141-7143.  
 S3. C. Wang, K. Tang, D. Wang, Z. Liu and L. Wang, *J. Mater. Chem.*, 2012, **22**, 22929-22934.  
 S4. S. Jana, S. K. Ghosh, S. Nath, S. Pande, S. Praharaj, S. Panigrahi, S. Basu, T. Endo and T. Pal, *Appl. Catal., A*, 2006, **313**, 41-48.  
 S5. T. Yao, T. Cui, X. Fang, F. Cui and J. Wu, *Nanoscale*, 2013. DOI: 10.1039/C3NR01470C.
